# Supplementary material for: Formation of lamellar micelle-like oligomers and membrane disruption revealed by the study of short peptide hIAPP18–27
Source: Royal Society of Chemistry journal article supplement (doi:10.1039/c6cp04431j), 2016-01-01
Supplement: c6cp04431j1.pdf [file c6cp04431j1.pdf]

Electronic Supplementary Material (ESI) for Physical Chemistry Chemical Physics.  
This journal is © the Owner Societies 2016

## **Supplementary Information**

### **Formation of Lamellar Micelle-like Oligomers and Membrane Disruption Revealed by the Study of Short Peptide hIAPP<sub>18-27</sub>**

Ying Wei<sup>†</sup>, Jun Lu<sup>†</sup>, Tong Lu<sup>†</sup>, Feihong Meng<sup>†</sup>, Jia Xu<sup>‡</sup>, Li Wang<sup>†</sup>, Yang Li<sup>†</sup>, Liping Wang<sup>\*\*</sup>, and Fei Li<sup>†\*</sup>

<sup>†</sup> State Key Laboratory of Supramolecular Structure and Materials, Jilin University, 2699 Qianjin Avenue, Changchun  
130012, P. R. China

<sup>‡</sup> College of Life Science, Jilin University, 2699 Qianjin Avenue, Changchun, 130012, P. R. China

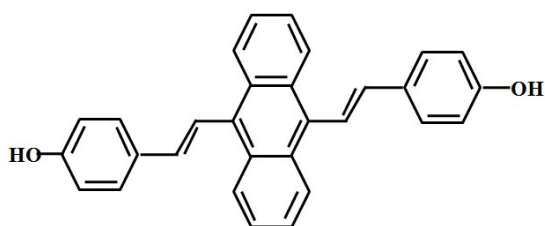

**Fig. S1** Structure of 9,10-bis (4-hydroxystyryl) anthracene.

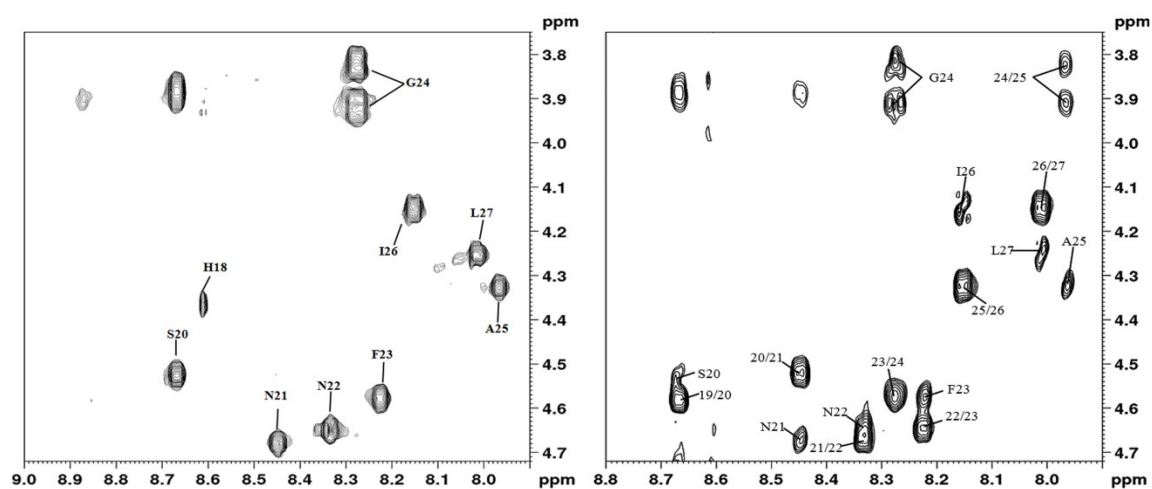

**Fig. S2** The HN-H $\alpha$  regions of the TOCSY (left) and ROESY (right) spectra of the sonicated hiAPP<sub>18-27</sub> in deionized water (pH 4.5) at 25 °C.

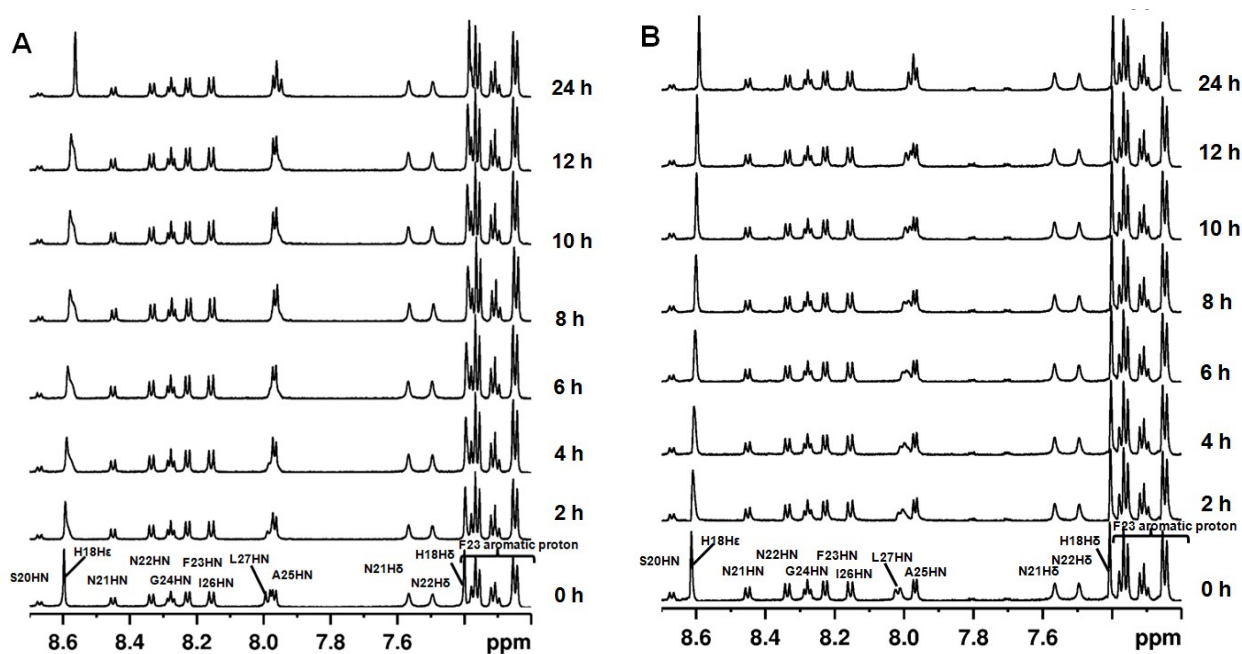

**Fig. S3**  $^1\text{H}$  NMR spectra of non-sonicated (A) and sonicated (B) hiAPP<sub>18-27</sub> in deionized water at the indicated time points (0-24 hours).

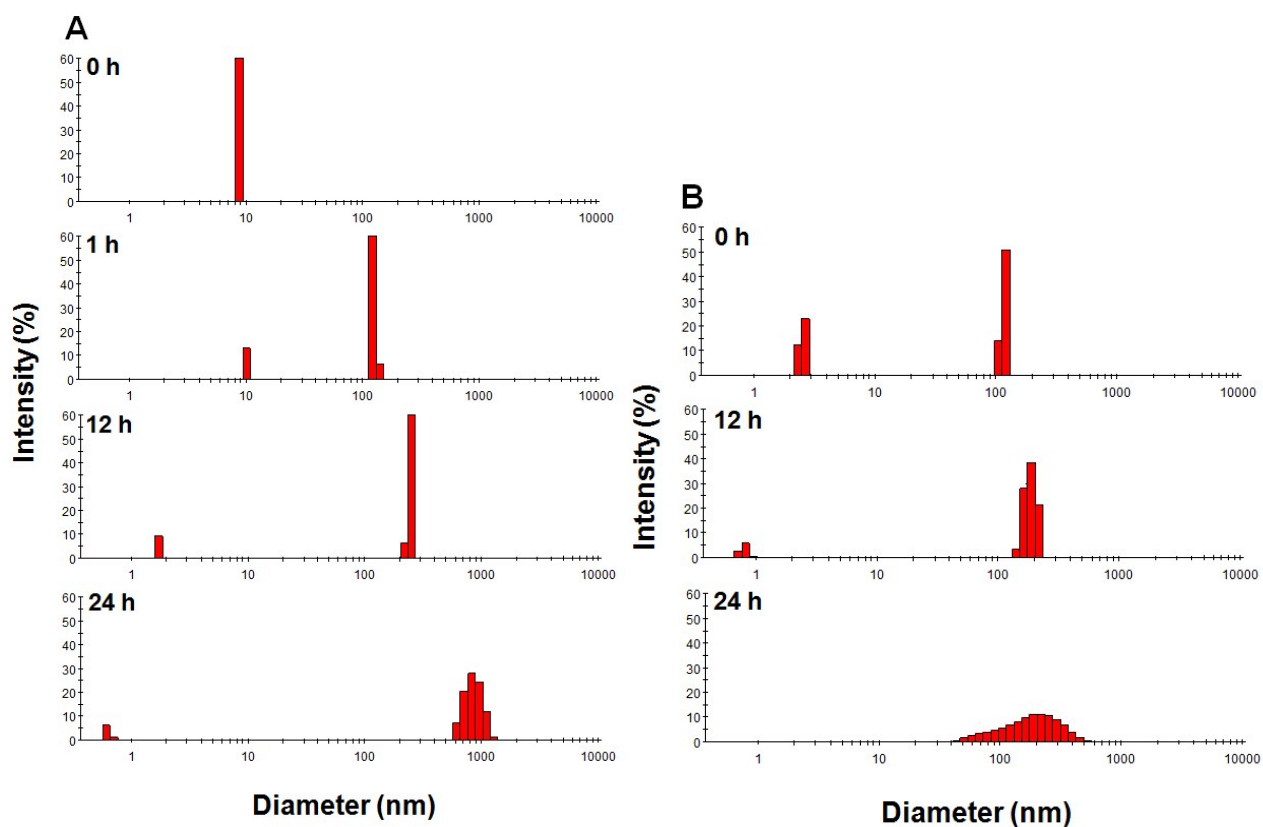

**Fig. S4** DLS results of non-sonicated hIAPP<sub>18-27</sub> incubated in deionized water for 0, 1, 12 and 24 h (A) and DLS results of sonicated hIAPP<sub>18-27</sub> incubated in deionized water for 0, 12 and 24 h after 1 h pre-treatment of sonication (B).

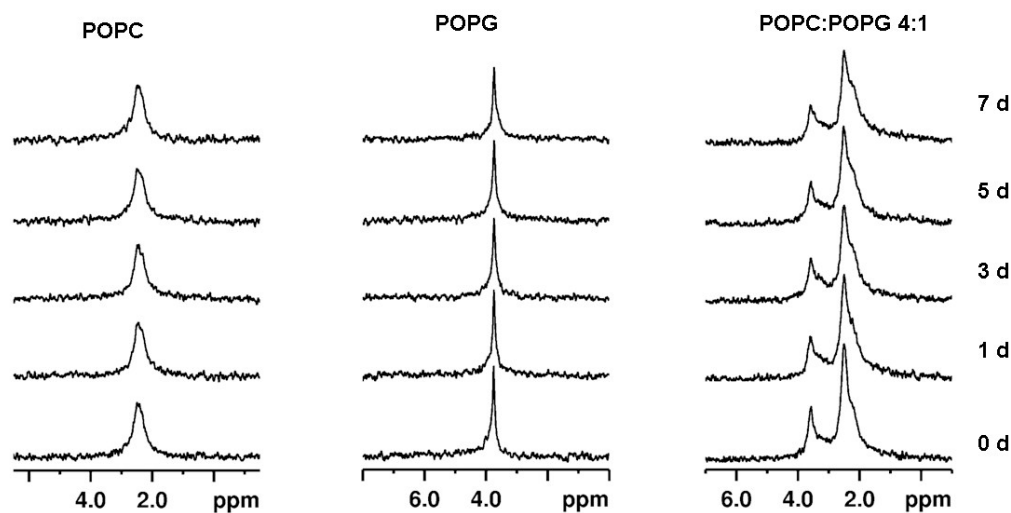

**Fig. S5** <sup>31</sup>P NMR spectra of POPC, POPG and POPC/POPG 4:1 SUVs in Tris/HCl buffer (pH 7.4) at various incubation time (0-7 days).

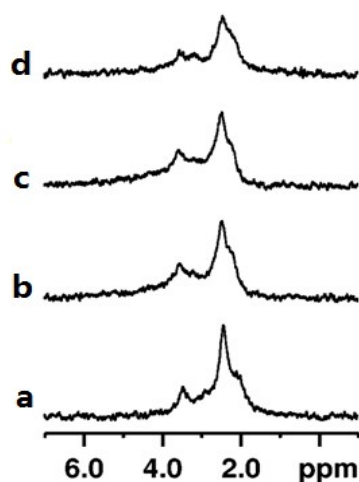

**Fig. S6** Time dependence of  $^{31}\text{P}$  NMR spectra of POPC/POPG (4:1) SUVs in Tris/HCl buffer (pH 7.4) containing sonicated hIAPP<sub>18-27</sub> that was incubated in deionized water for five days (five-day-incubated peptide) prior to being added into the SUV solution. a: SUVs alone; b-d: the mixture of SUVs and five-day-incubated peptide measured immediately after the preparation, incubation for 1 day and 5 days, respectively).

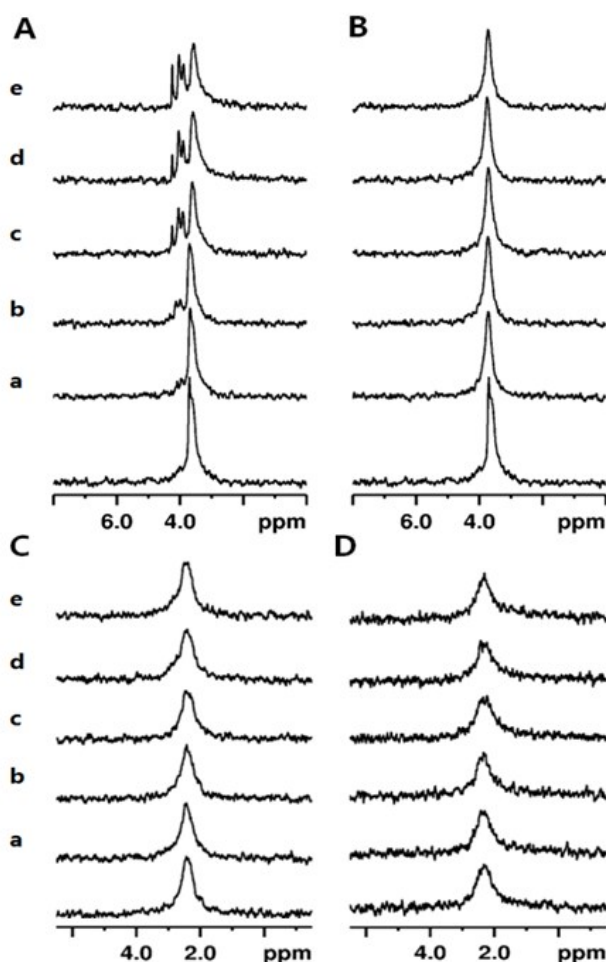

**Fig. S7** (A, B)  $^{31}\text{P}$  NMR spectra of POPG SUVs alone and in the presence of sonicated (A) and non-sonicated (B) hIAPP<sub>18-27</sub> at various incubation time (a: 0 day; b: 1 day; c: 3 day; d: 5 day; e: 7 day). (C, D)  $^{31}\text{P}$  NMR spectra of POPC SUVs alone and in the presence of sonicated (C) and non-sonicated (D) hIAPP<sub>18-27</sub> at various incubation time (a: 0 day; b: 1 day; c: 3 days; d: 5 days; e: 7 days). Tris/HCl buffer at pH 7.4 was used in the experiments.

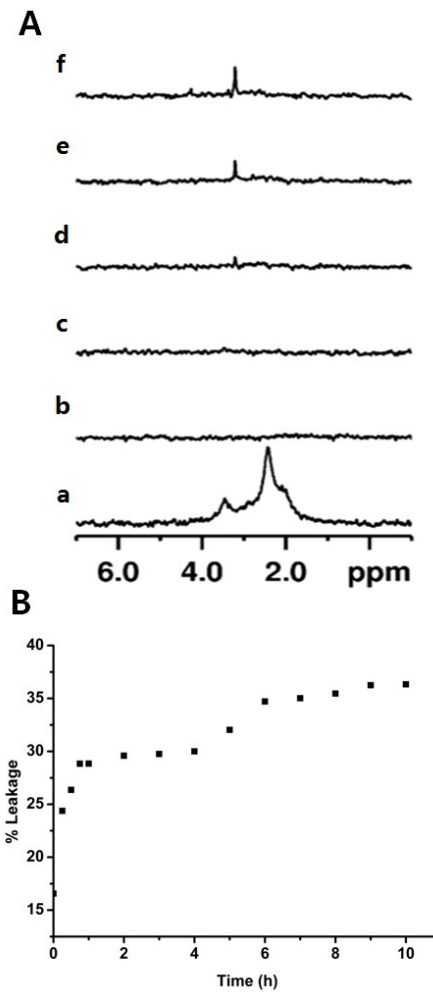

**Fig. S8** (A)  $^{31}\text{P}$  NMR spectra of POPC/POPG (4:1) SUVs in the absence (a) and in the presence of hiAPP<sub>1-37</sub> at various incubation time (b: 0 day; c: 1 day; d: 3 days; e: 5 days; f: 7 days). (B) Time dependence of the leakage of calcein in POPC/POPG (4:1) LUVs induced by hiAPP<sub>1-37</sub>. Tris/HCl buffer at pH 7.4 was used in the experiments.

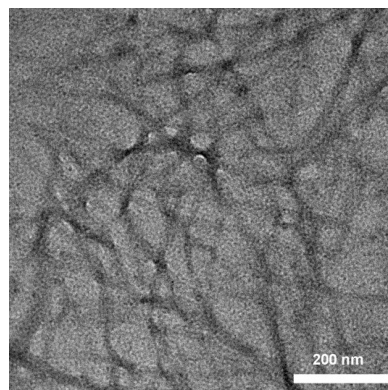

**Fig. S9** TEM image of hiAPP<sub>18-27</sub> incubated in deionized water at pH 5.6 for 6 h.
